# Supplementary material for: A morpho-tectonic approach to the study of earthquakes in Rome
Source: Copernicus journal article supplement (doi:10.5194/nhess-2021-399), 2022-01-04
Supplement: Supplementary file [file nhess-2021-399-AC1-supplement.pdf]

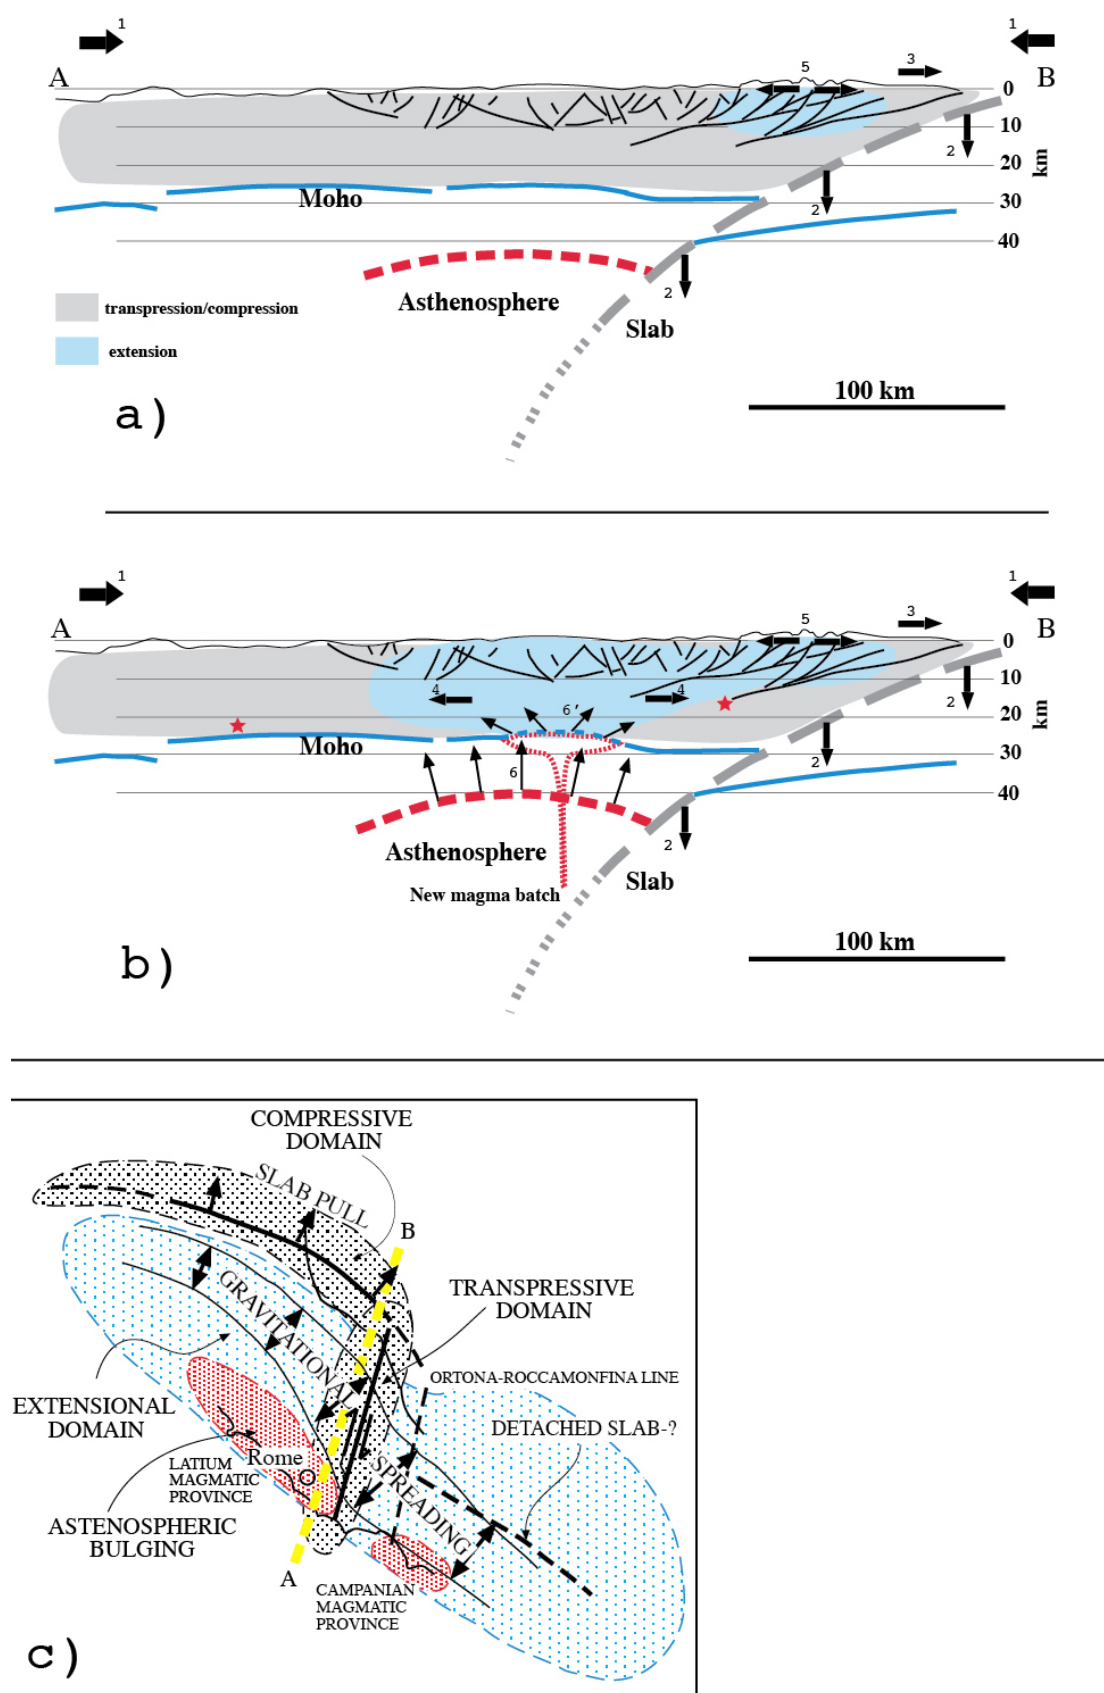

**Figure 12** a-b) Interpretative geodynamic cross-section and (c) map of central Italy, explaining the superimposition of two competitive stress-field (extension and transpression) in this region (see text for explanations). Red stars are the hypocenters of the two earthquakes occurred in this region with fault plane solution showing anti-apenninic (NE-SW) *P*-axis.
